# Supplementary material for: On–Off switching of the phosphorescence signal in a carbon dot/polyvinyl alcohol composite for multiple data encryption
Source: Royal Society of Chemistry journal article supplement (doi:10.1039/c9nr05123f), 2019-01-01
Supplement: c9nr05123f1.pdf [file c9nr05123f1.pdf]

## Supporting Information

### On-Off Switching of the Phosphorescence Signal in a Carbon Dot/Polyvinyl Alcohol Composite for the Multiple Data Encryption

Xin Bao,<sup>a,b</sup> Elena V. Ushakova,<sup>d,e</sup> Enshan Liu,<sup>c</sup> Zhengjie Zhou,<sup>a,b</sup> Di Li,<sup>a</sup> Ding Zhou,<sup>a</sup> Songnan Qu<sup>\*c</sup>, Andrey L. Rogach<sup>d,e</sup>

<sup>a</sup> State Key Laboratory of Luminescence and Applications, Changchun Institute of Optics, Fine Mechanics and Physics, Chinese Academy of Sciences, Changchun 130033, PR China

<sup>b</sup> University of Chinese Academy of Sciences, Beijing 100049, PR China

<sup>c</sup> Joint Key Laboratory of the Ministry of Education, Institute of Applied Physics and Materials Engineering, University of Macau, Taipa, Macau, PR China. Email: songnanqu@umac.mo

<sup>d</sup> Center of Information Optical Technologies, ITMO University, Saint Petersburg 197101, Russia

<sup>e</sup> Department of Materials Science and Engineering, and Centre for Functional Photonics, City University of Hong Kong, 83 Tat Chee Avenue, Kowloon, Hong Kong SAR, PR China

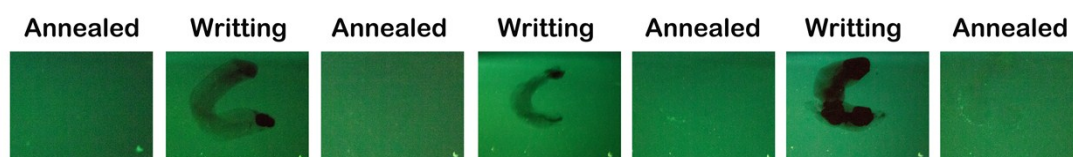

Fig. S1 Repeatability of the water mediated on-off phosphorescence processing in 200°C annealed CDs@PVA film. From left to right: (i) A character “C” was written using water as ink on the 200°C annealed CDs@PVA film, which could be clearly distinguished from the phosphorescent background; (ii) the character “C” has been erased as a result of 100°C annealing; (ii) another character “C” was written using water on the same area, and vanished upon further annealing. These processes can be repeated several times.

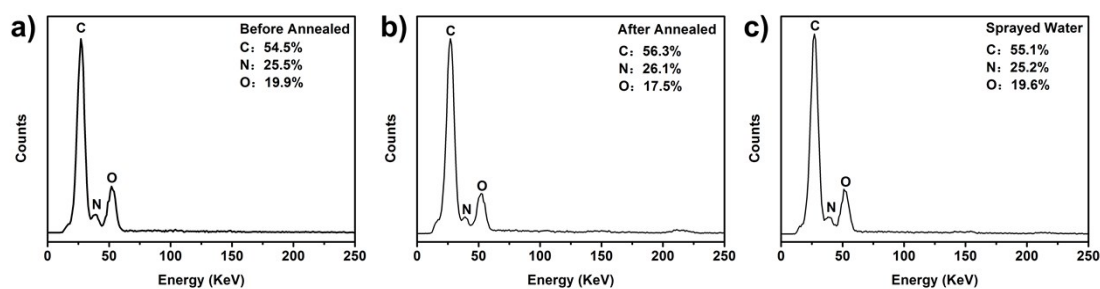

Fig. S2 EDS survey spectra of the CDs@PVA composite a) before and b) after 200°C annealing, and c) after subsequent water spraying.

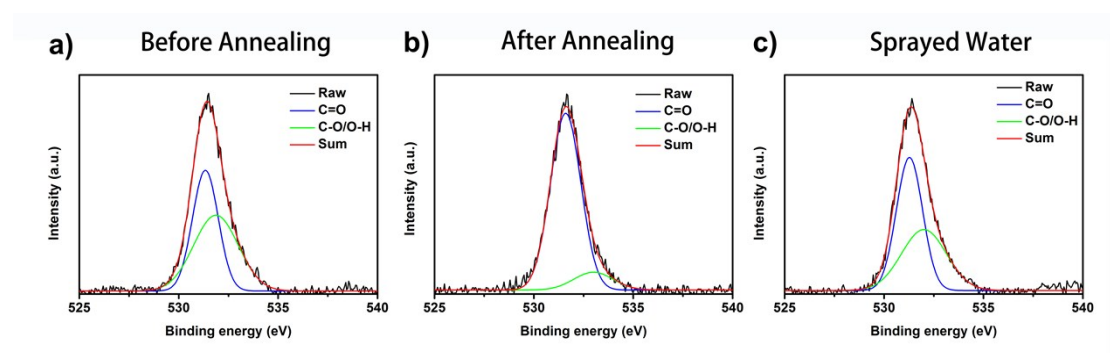

Fig. S3 Deconvolutions of high-resolution  $O_{1s}$  XPS spectra of the CDs@PVA composite a) before and b) after 200°C annealing, and c) after subsequent water spraying.

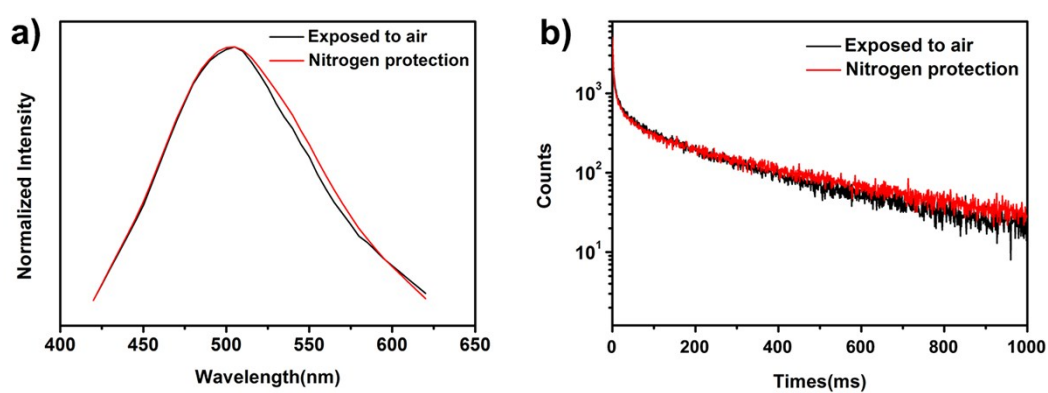

Fig. S4 a) Phosphorescence spectra and b) phosphorescence decay curves monitored at 480 nm (360 nm excitation) of 200°C annealed CDs@PVA composites recorded under air and under nitrogen protection.
